# Supplementary material for: Interventions to maximize facial cleanliness and achieve environmental improvement for trachoma elimination: A review of the grey literature
Source: PubMed Central journal article supplement (PMC5800663; doi:10.1371/journal.pntd.0006178), 2018-01-25
Supplement: pntd.0006178.s008.pdf [file pntd.0006178.s008.pdf]

**S4 Table. Conceptual and behavioral frameworks indicated in the grey literature**

| Brief description of conceptual/behavioral framework                                                                                                                                                                                                                                                                          | Reference                                                                                                                                                                                                                                                                              |
|-------------------------------------------------------------------------------------------------------------------------------------------------------------------------------------------------------------------------------------------------------------------------------------------------------------------------------|----------------------------------------------------------------------------------------------------------------------------------------------------------------------------------------------------------------------------------------------------------------------------------------|
| <p><b>Integrated Behavioural Model for Water, Sanitation, and Hygiene (IBM-WASH)</b><br/>                     A behavior change model that acknowledges 3 dimensions (contextual, psychosocial, technology factors) that operate on 5 levels (structural, community, household, individual, habitual)</p>                     | <p>Formative research assessment and guidelines: Facial cleanliness and environmental sanitation</p>                                                                                                                                                                                   |
| <p><b>Communication for Water Treatment &amp; Hygiene Framework</b><br/>                     A predictive model developed to guide the design &amp; evaluation of interventions that promote improved water, sanitation, &amp; hygiene behaviours by linking outcome evidence to specific health communication strategies</p> | <ul style="list-style-type: none"> <li>• Formative research assessment and guidelines</li> <li>• Understanding individual and contextual factors for development of a behavior change communication campaign for trachoma prevention in Busoga and Karamoja regions, Uganda</li> </ul> |
| <p><b>Risk Perception Attitude Framework (RPA)</b><br/>                     A framework adapted from the Extended Parallel Process Model (EPPM) that explains the mediating role of self-efficacy in the relationship between risk and behaviors</p>                                                                          | <p>Understanding individual and contextual factors for development of a behavior change communication campaign for trachoma prevention in Busoga and Karamoja regions, Uganda</p>                                                                                                      |
| <p><b>Evo-Eco approach to behaviour change</b><br/>                     A behavior change approach with a foundation in evolutionary biology &amp; ecological psychology that suggests brains evolved to provide adaptive behavioral responses to rapidly changing or complex environmental conditions</p>                    | <p>Research to inform the development of behavior change interventions for “F” and “E” of the SAFE strategy in Turkana and Marsabit, Kenya</p>                                                                                                                                         |
| <p><b>Positive Deviance (PD) approach</b><br/>                     A strengths-based, problem solving approach to behavioral &amp; social change that enables a community to discover existing solutions to complex problems within the community</p>                                                                         | <p>Women and trachoma: Achieving gender equity in the implementation of SAFE</p>                                                                                                                                                                                                       |
| <p><b>Hygiene Improvement Framework</b> (developed via the Environmental Health Project)<br/>                     Comprehensive approach to hygiene improvement that addresses three elements: hygiene promotion, access to hardware, and support from enabling environments</p>                                              | <p>Implementing the SAFE strategy for trachoma control: A toolbox for promoting facial cleanliness and environmental improvement</p>                                                                                                                                                   |
| <p><b>Participatory Hygiene and Sanitation Transformation (PHAST)</b><br/>                     A participatory learning approach that aims to help communities improve hygiene behaviors and encourage effective management of water and sanitation services</p>                                                              | <p>The SAFE strategy: Preventing trachoma - A guide for sanitation and improved hygiene</p>                                                                                                                                                                                            |
| <p><b>Community-led total sanitation (CLTS)</b><br/>                     A demand-side approach that mobilizes communities to completely eliminate open defecation through the “triggering” of latent demand and/or creation of novel demand for access to and utilization of sanitation facilities</p>                       | <p>Handbook on community-led total sanitation</p>                                                                                                                                                                                                                                      |
